# Supplementary material
Source: PubMed Central journal article supplement (PMC3232779)
Supplement: supp_55.12.5819_FigureS1.pdf [file supp_55.12.5819_FigureS1.pdf]

**Supplemental Figure 1.** TB drug activity (TDA) for ethambutol and pyrazinamide for drug-susceptible *M. tuberculosis* isolates.

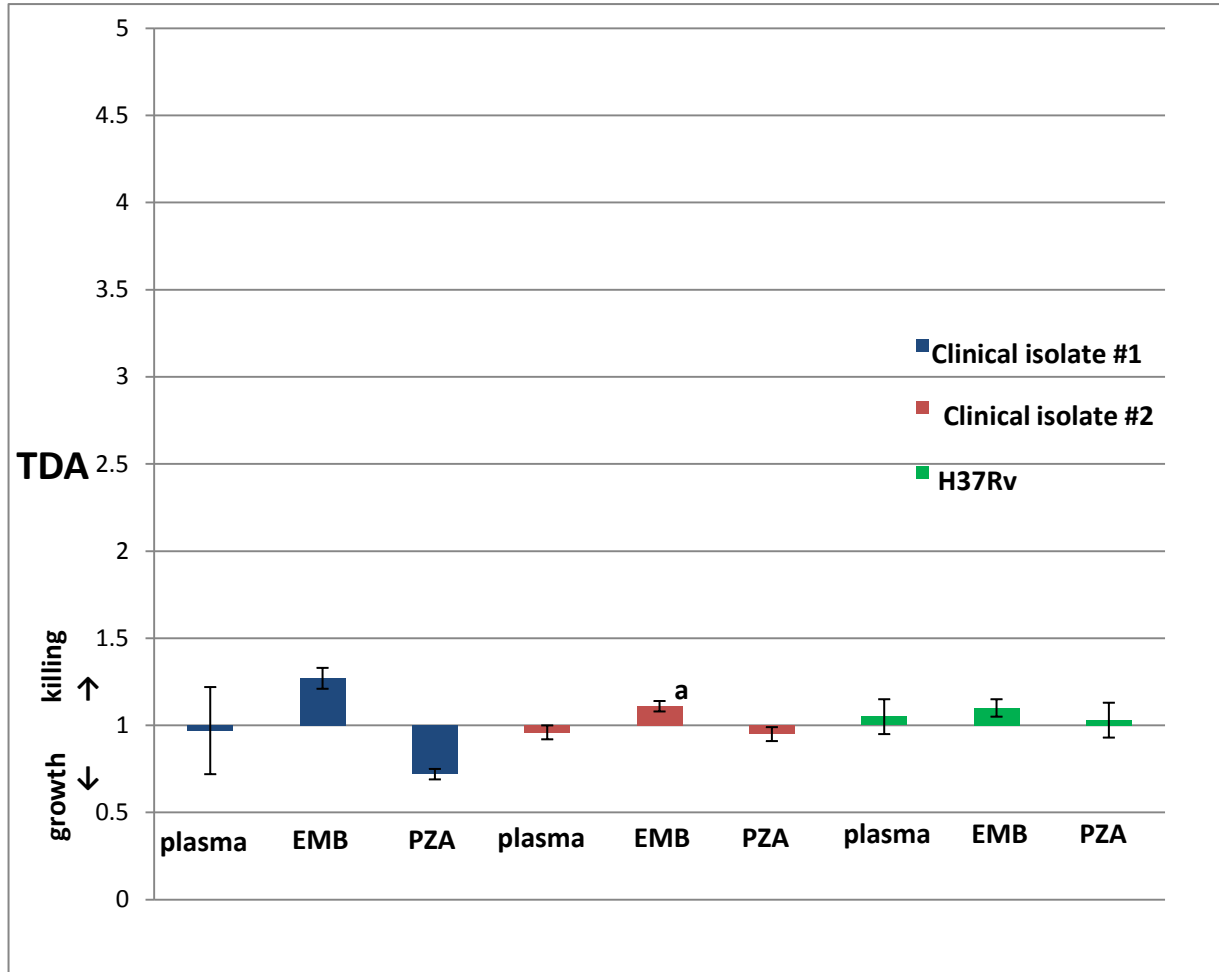

TDA was performed using *M. tuberculosis* isolates and volunteer plasma alone or plasma spiked with 5 µg/ml ethambutol (EMB) or 30 µg/ml pyrazinamide (PZA); expected C<sub>2hr</sub> range for EMB= 2-6 µg/ml and PZA= 20-50 µg/ml. TDA reported as a ratio of time-to-detection of plasma co-cultured *M. tuberculosis* vs. time-to-detection of *M. tuberculosis* alone. TDA ratio =1.0 indicates stasis, TDA>1.0 indicates killing, and TDA<1.0 indicates growth. The clinical isolates #1 and #2 and laboratory strain, H37Rv, had ethambutol (EMB) MICs of 2.5 µg/ml which was susceptible by 1% proportions method. All isolates were also susceptible to PZA.

<sup>a</sup>For clinical isolate #2, mean TDA with EMB at 5 µg/ml was  $1.11 \pm 0.03$  which differed significantly from plasma alone  $0.96 \pm 0.04$ ,  $p=0.05$ . All other comparisons were not statistically significant.
